# Supplementary material
Source: Springer Nature journal article supplement (https://www.springermedizin.de/resource/supplementary/13256_2009_1878_MOESM1_ESM.pdf/9648650)

FR 6Hz 42°  
P1

**2D**  
46%  
C 55  
P Med.  
Gen  
**CF**  
71%  
1620Hz  
WF 72Hz  
Bassa

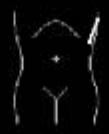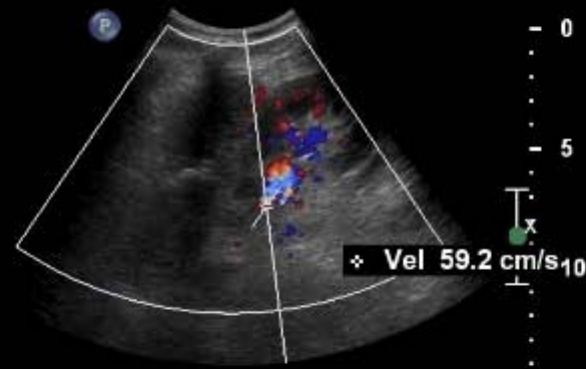

**PW**  
36%  
WF 60Hz  
SV 1.5mm  
M3  
2.5MHz  
7.5cm

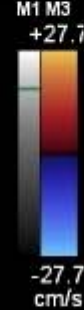

❖ Vel 59.2 cm/s<sub>10</sub>

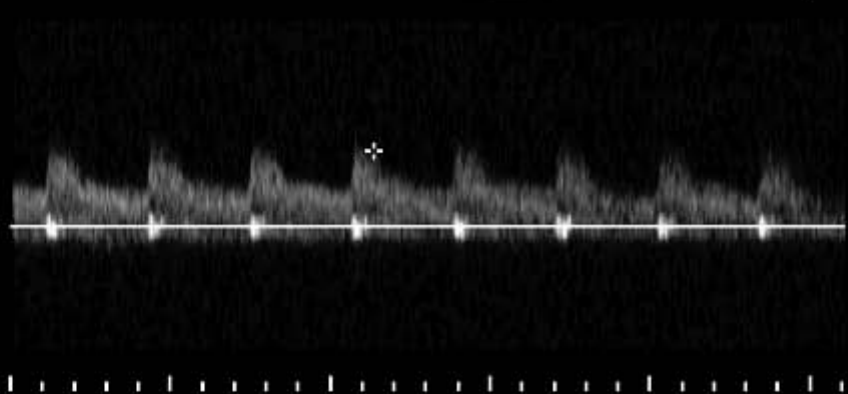

- 160  
-  
- 80  
-  
- cm/s  
-  
- 80

6.6s

Supplement: MOESM1 [file 9648650]
